# Supplementary material for: Coupling Analysis of Ecosystem Services Value and Economic Development in the Yangtze River Economic Belt: A Case Study in Hunan Province, China
Source: MDPI journal article supplement (doi:10.3390/rs13081552), 2021-04-16
Supplement: s1 [file s1]

Archive with 1 entries (1 files):
- remotesensing-1143189-supplementary.pdf
