# Supplementary material for: Coupling Analysis of Ecosystem Services Value and Economic Development in the Yangtze River Economic Belt: A Case Study in Hunan Province, China
Source: MDPI journal article supplement (doi:10.3390/rs13081552), 2021-04-16
Supplement: s1 [file s1 › remotesensing-1143189-supplementary.pdf]

**Supplementary Materials:** Figure S1. Spatial pattern of the average ecosystem services value in Hunan Province from 2000 to 2018 (US\$/hm<sup>2</sup>). Figure S2. Spatial pattern of gross domestic product (GDP) per unit area in Hunan Province from 2000 to 2018 (US\$/km<sup>2</sup>).

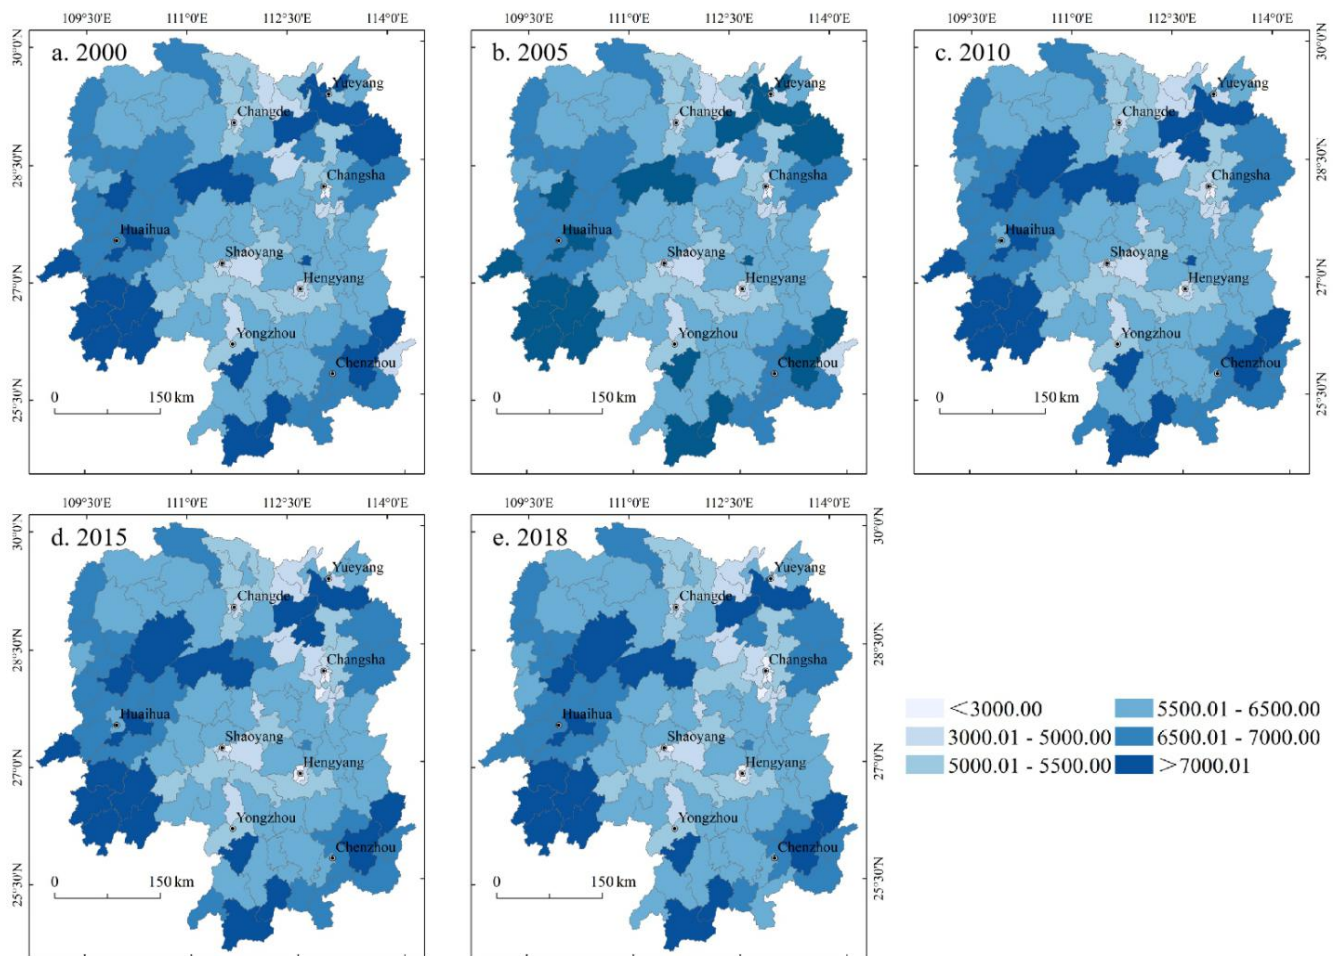

**Figure S1.** Spatial pattern of the average ecosystem services value in Hunan Province from 2000 to 2018 (US\$/hm<sup>2</sup>).

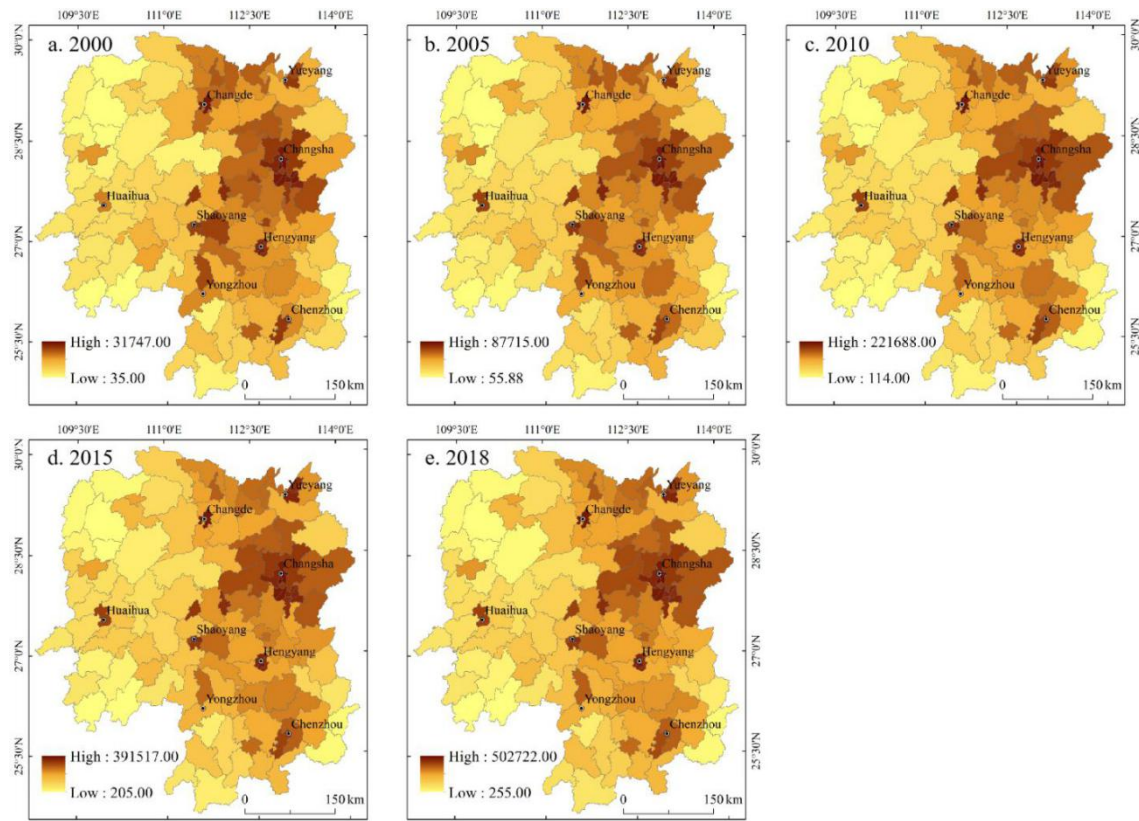

**Figure S2.** Spatial pattern of gross domestic product (GDP) per unit area in Hunan Province from 2000 to 2018 (US\$/km<sup>2</sup>). (a) the spatial pattern of GDP per unit area in 2000; (b) the spatial pattern of GDP per unit area in 2005; (c) the spatial pattern of GDP per unit area in 2010; (d) the spatial pattern of GDP per unit area in 2015; and (e) the spatial pattern of GDP per unit area in 2018.
